# Supplementary material for: Incorporating polyoxometalates and organic ligands to pursue 3d–4f heterometallic clusters: a series of {Cr4Ln4} clusters stabilized by phthalic acid and [SiW12O40]4−
Source: Royal Society of Chemistry journal article supplement (doi:10.1039/c9ra01731c), 2019-01-01
Supplement: c9ra01731c1.pdf [file c9ra01731c1.pdf]

*Electronic supplementary information*

**Incorporating polyoxometalates and organic ligands to pursue  
3d-4f heterometallic clusters: a series of {Cr<sub>4</sub>Ln<sub>4</sub>} clusters  
stabilized by phthalic acid and [SiW<sub>12</sub>O<sub>40</sub>]<sup>4-</sup>**

Ya-Nan Gu,<sup>a</sup> Dan Zhao,<sup>b</sup> Hao Yu,<sup>a</sup> Rui Ge,<sup>a</sup> Zhong Li,<sup>a</sup> Chong-Bian Tian,<sup>c</sup> Xin-Xiong Li,<sup>\*a</sup> Yan-Qiong Sun,<sup>a</sup> Shou-Tian Zheng<sup>\*a</sup>

<sup>a</sup> State Key Laboratory of Photocatalysis on Energy and Environment, College of Chemistry, Fuzhou University, Fuzhou, Fujian 350108, China.

<sup>b</sup> Fuqing Branch of Fujian Normal University, Fuqing, Fujian, 350300, China.

<sup>c</sup> State Key Laboratory of Structural Chemistry, Fujian Institute of Research on the Structure of Matter, Chinese Academy of Sciences, Fuzhou, Fujian 350108 China.

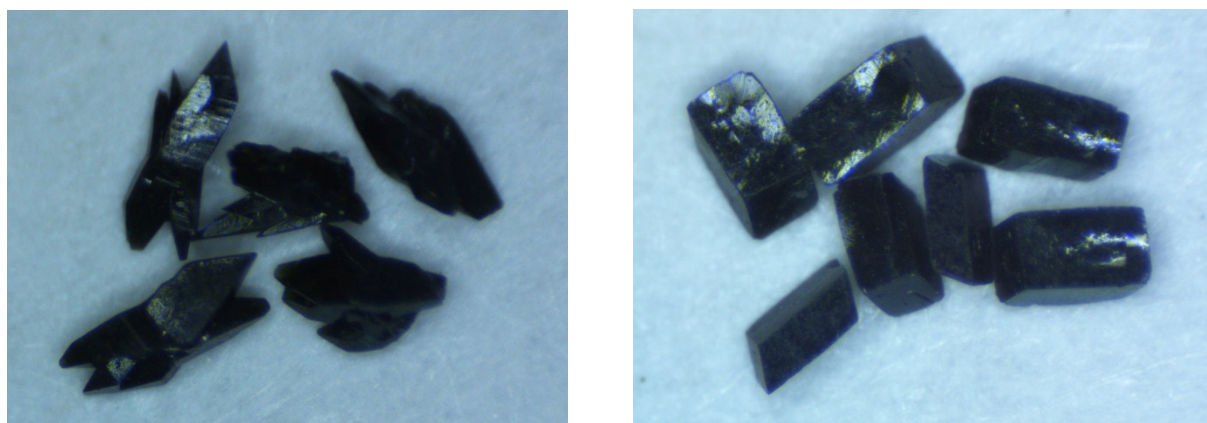

**Figure S1** black block crystals of **1-Ce** (left) and **2-Tb** (right).

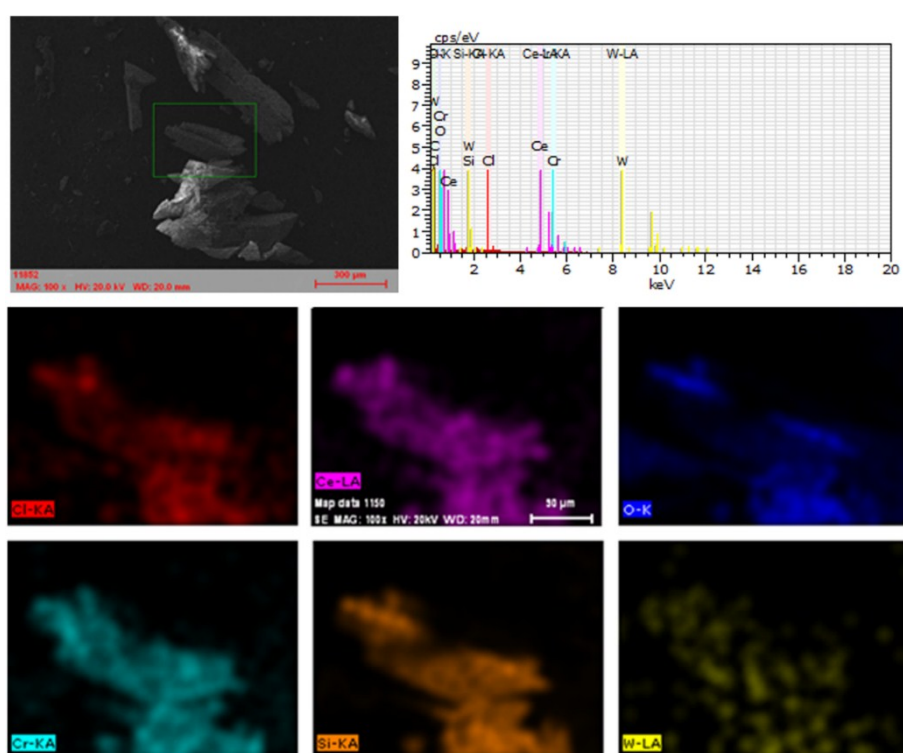

**Figure S2** The EDS elemental mapping of Cl, Ce, O, Cr, Si, and W for **1-Ce**.



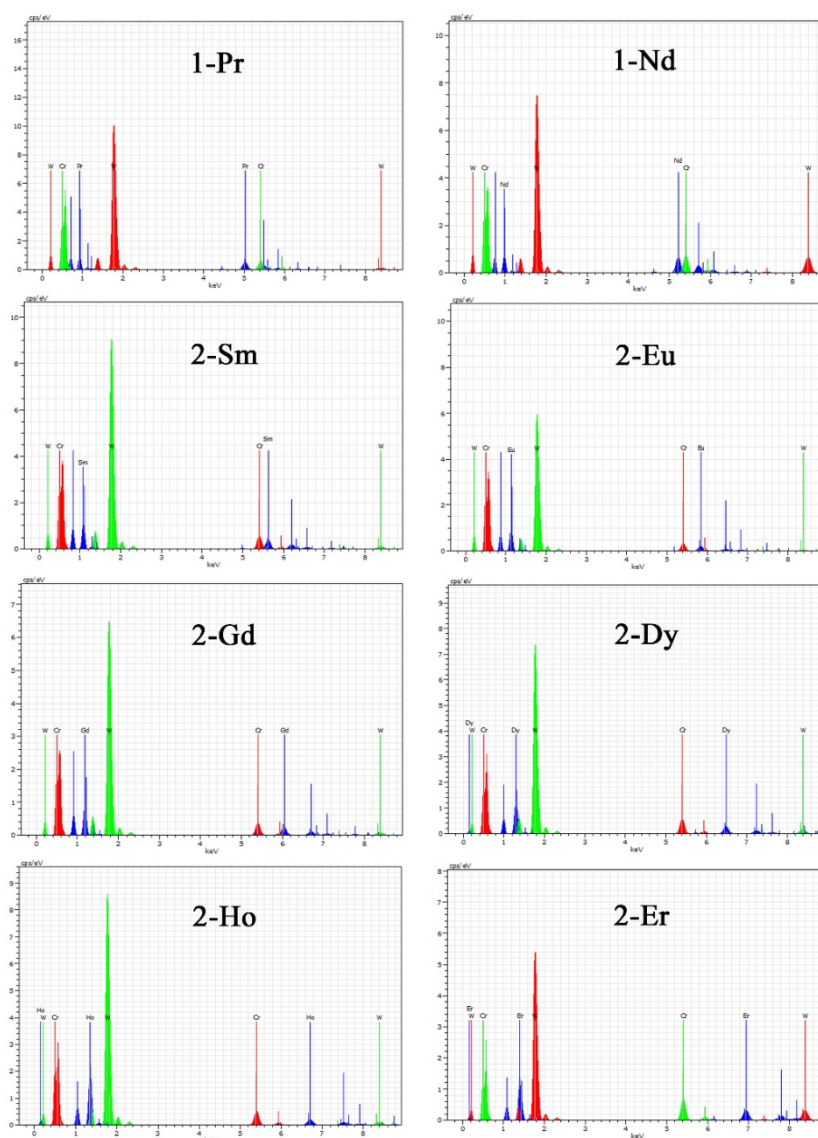

**Figure S4** The EDS spectra of **1-Ln** (Ln = Pr<sup>3+</sup>, Nd<sup>3+</sup>) and **2-Ln** (Sm<sup>3+</sup>, Er<sup>3+</sup>, Gd<sup>3+</sup>, Tb<sup>3+</sup>, Ho<sup>3+</sup>, Er<sup>3+</sup>)

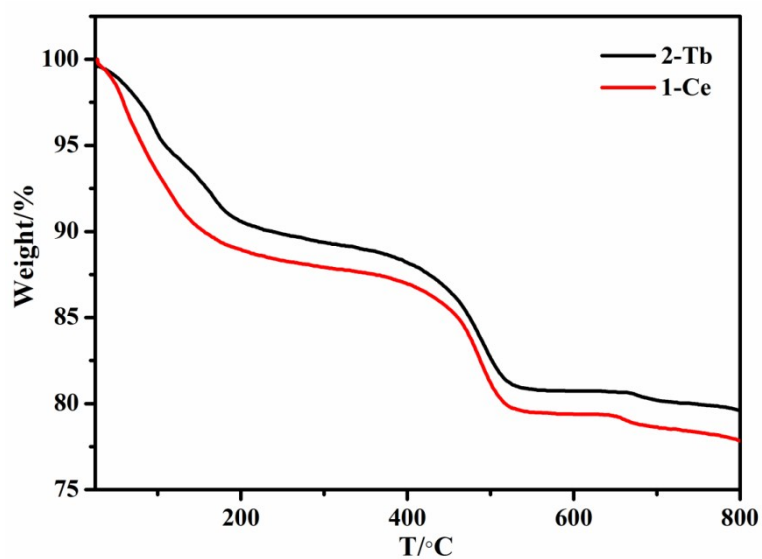

**Figure S5** The TG curves of **1-Ce** and **2-Tb**.



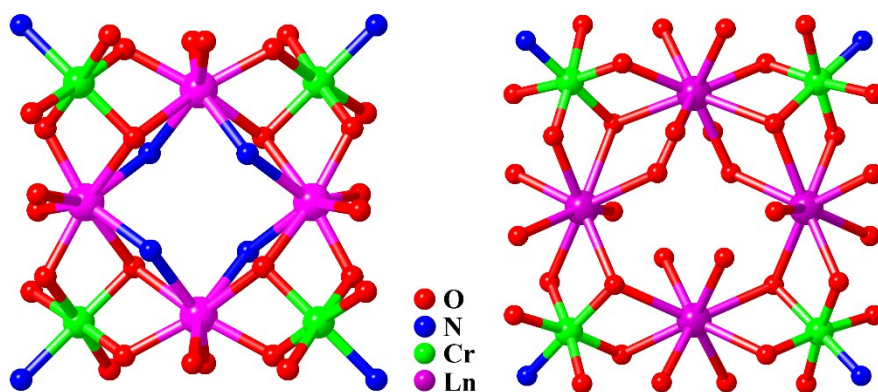

Figure S6 The planar square-like  $[Cr_4Ln_4]$  clusters in Powell's work.

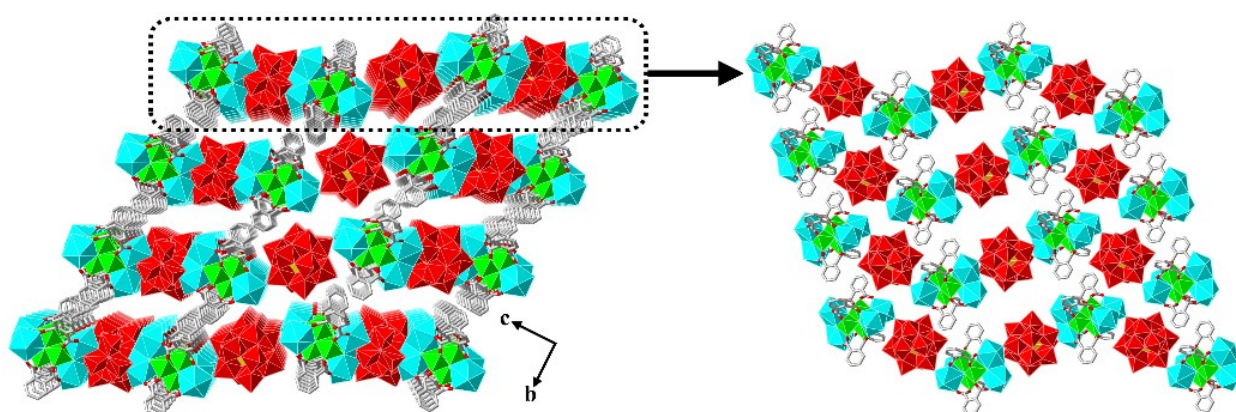

Figure S7 View of the stacking style of 1-D chains in **1-Ce**.

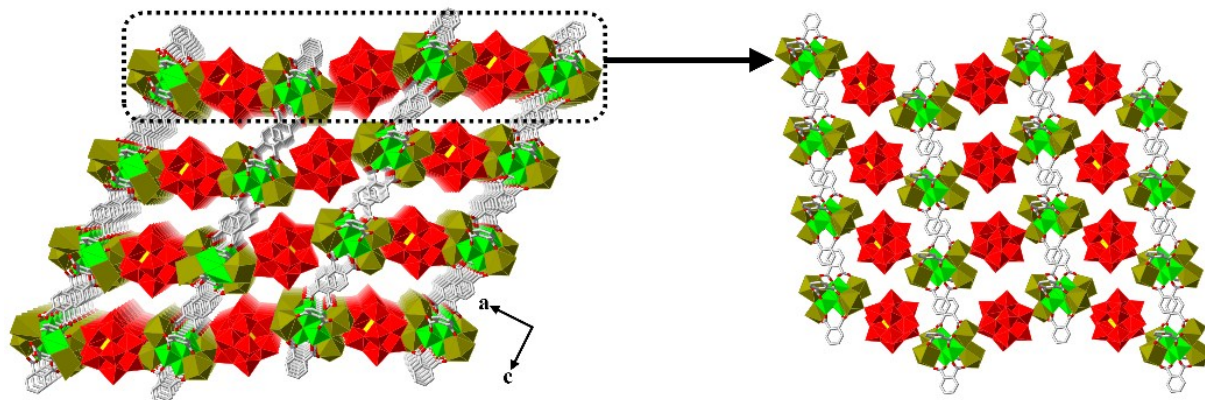

Figure S8 View of the stacking style of 1-D chains in **2-Tb**.

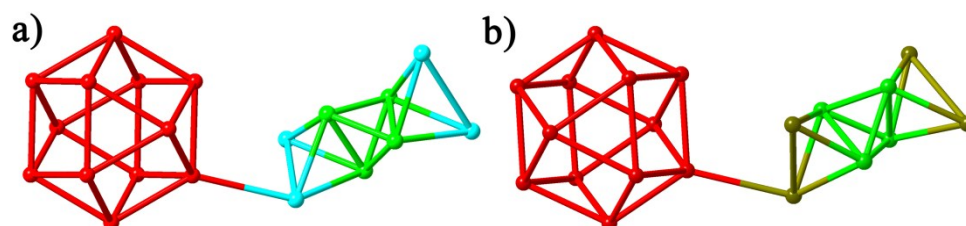

Figure S9 The decorated motif of compounds **1-Ce** and **2-Tb** with symbol of 3,4,4,5M20-1. Color code: W (red balls), Ce (cyan balls), Tb (olive balls), Cr (green balls).

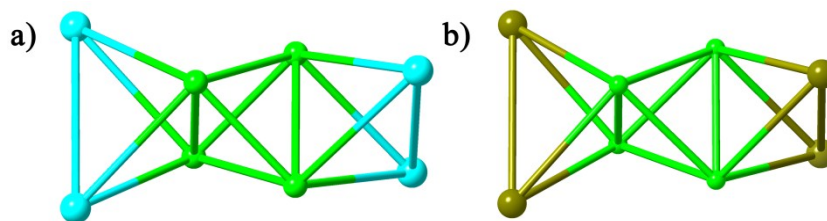

**Figure S10** The decorated motif 3,5M8-1 of  $\text{Cr}_4\text{Ce}_4$  and  $\text{Cr}_4\text{Tb}_4$  core. Color code: W (red balls), Ce (cyan balls), Tb (olive balls), Cr (green balls).

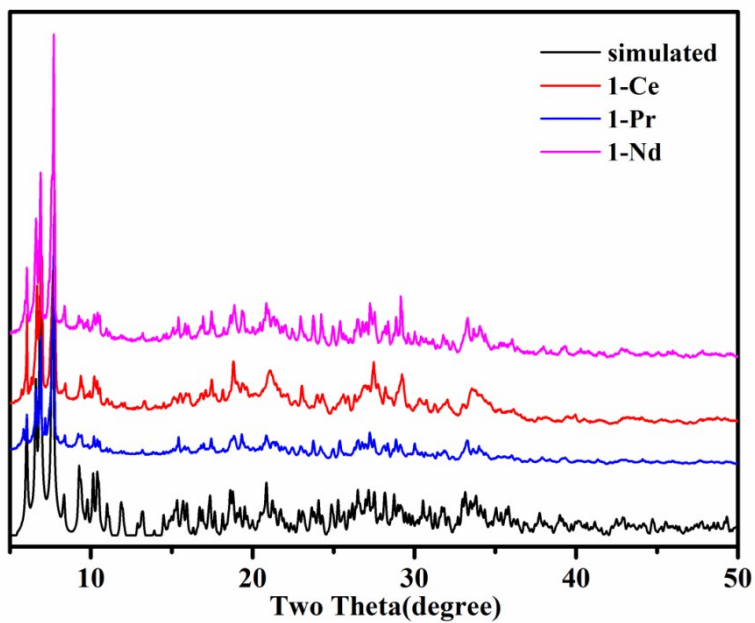

**Figure S11** The simulated and experimental PXRD patterns of **1-Ln** ( Ln = Ce, Pr, Nd).

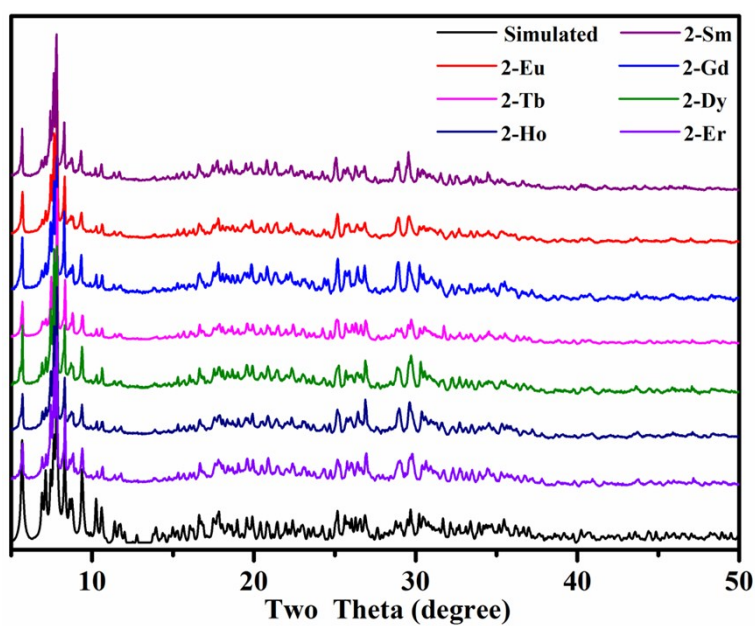

**Figure S12** The simulated and experimental PXRD patterns of **2-Ln** ( Ln = Sm, Eu, Gd, Tb, Dy, Ho, Er).

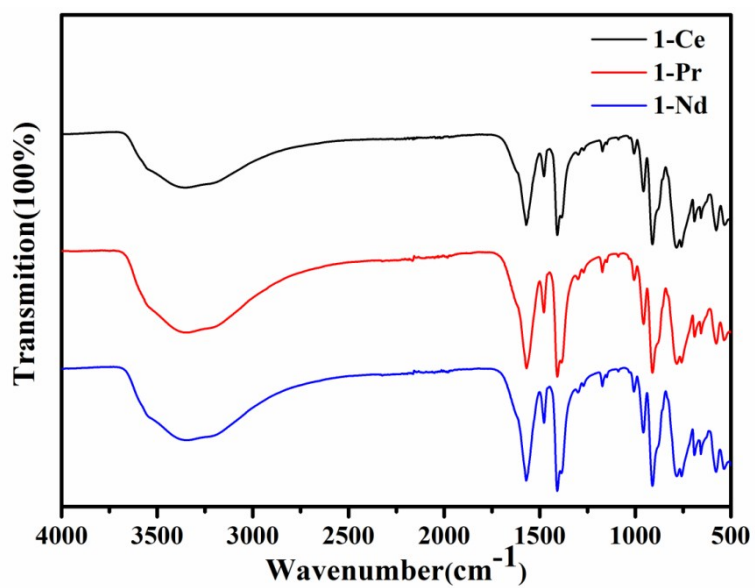

Figure S13 The IR spectra of **1-Ln** ( Ln = Ce, Pr, Nd).

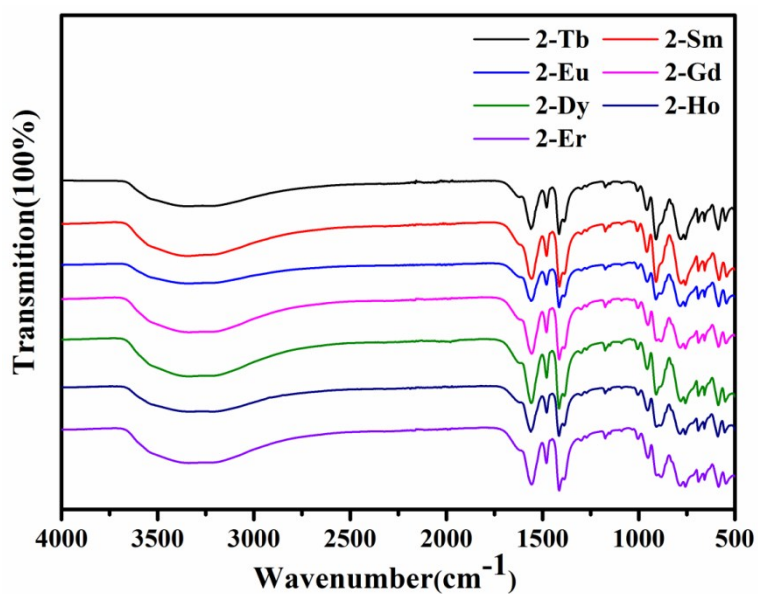

Figure S14 The IR spectra of **2-Ln** ( Ln = Sm, Eu, Gd, Tb, Dy, Ho, Er).

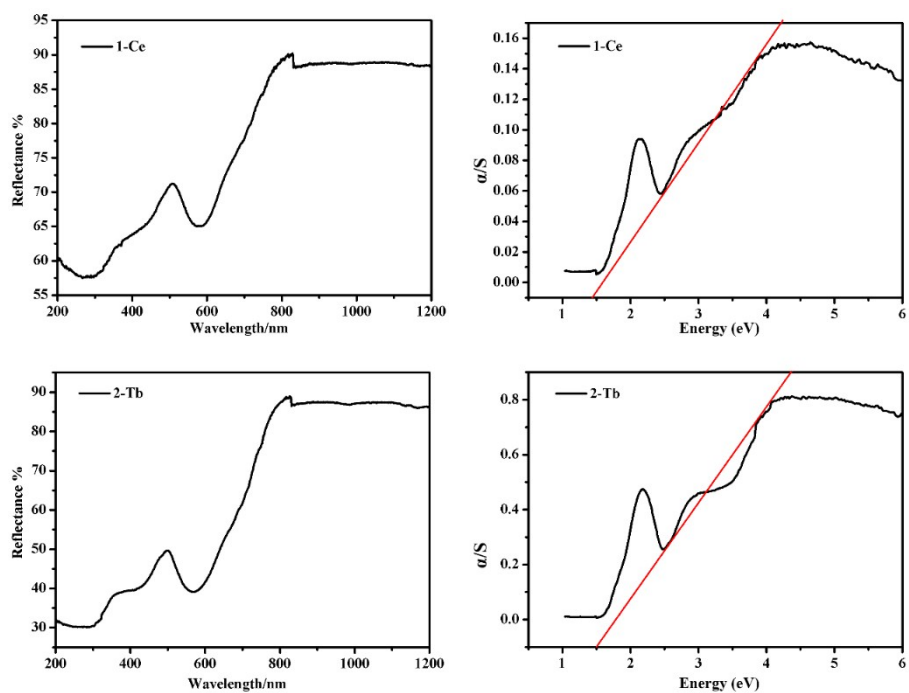

**Figure S15** The UV-Vis diffuse reflectance spectra and Kubelka-Munk Function vs. energy curves of **1-Ce** and **2-Tb**.



**Table S1** Selected bond lengths (Å) and bond valence calculations ( $\Sigma_s$ ) for **1-Ce** and **2-Tb**.

| <b>1-Ce</b> |                  |              |                     |
|-------------|------------------|--------------|---------------------|
| Bond        | Bond lengths (Å) | Bond valence | Sum of Bond valence |
| Cr1-O9      | 1.971            | 0.470        | $\Sigma_s = 2.702$  |
| Cr1-O7      | 1.971            | 0.470        |                     |
| Cr1-O6      | 1.984            | 0.451        |                     |
| Cr1-O18     | 1.983            | 0.452        |                     |
| Cr1-O14     | 1.99             | 0.442        |                     |
| Cr1-O2      | 2.008            | 0.418        |                     |
| Cr2-O18     | 1.959            | 0.485        | $\Sigma_s = 2.723$  |
| Cr2-O1      | 1.963            | 0.482        |                     |
| Cr2-O8      | 1.976            | 0.462        |                     |
| Cr2-O7      | 1.996            | 0.434        |                     |
| Cr2-O5      | 1.995            | 0.435        |                     |
| Cr2-O17     | 2.003            | 0.422        |                     |
| Cr3-O7      | 1.973            | 0.467        | $\Sigma_s = 2.643$  |
| Cr3-O13     | 1.981            | 0.455        |                     |
| Cr3-O4      | 1.994            | 0.437        |                     |
| Cr3-O6      | 1.994            | 0.437        |                     |
| Cr3-O1      | 2.003            | 0.424        |                     |
| Cr3-O16     | 2.004            | 0.423        |                     |
| Cr4-O1      | 1.962            | 0.483        | $\Sigma_s = 2.738$  |
| Cr4-O10     | 1.962            | 0.483        |                     |
| Cr4-O18     | 1.981            | 0.455        |                     |
| Cr4-O3      | 1.983            | 0.452        |                     |
| Cr4-O6      | 1.994            | 0.437        |                     |
| Cr4-O15     | 2.001            | 0.427        |                     |
| Bond        | Bond lengths (Å) | Bond valence | Sum of Bond valence |
| Ce1-O7      | 2.484            | 0.407        | $\Sigma_s = 3.130$  |
| Ce1-O7w     | 2.496            | 0.393        |                     |
| Ce1-O38     | 2.512            | 0.3742       |                     |
| Ce1-O12     | 2.514            | 0.372        |                     |
| Ce1-O13     | 2.523            | 0.362        |                     |
| Ce1-O4w     | 2.532            | 0.353        |                     |
| Ce1-O9      | 2.538            | 0.347        |                     |
| Ce1-O6w     | 2.588            | 0.299        |                     |
| Ce1-O17w    | 2.688            | 0.222        |                     |
| Ce2-O1      | 2.495            | 0.394        | $\Sigma_s = 3.190$  |
| Ce2-O1w     | 2.496            | 0.393        |                     |
| Ce2-O8w     | 2.511            | 0.376        |                     |
| Ce2-O10     | 2.513            | 0.373        |                     |
| Ce2-O25     | 2.513            | 0.373        |                     |

|         |       |       |                    |
|---------|-------|-------|--------------------|
| Ce2-O8  | 2.528 | 0.357 |                    |
| Ce2-O23 | 2.527 | 0.358 |                    |
| Ce2-O32 | 2.543 | 0.342 |                    |
| Ce2-O3w | 2.685 | 0.224 |                    |
| Ce3-O18 | 2.458 | 0.440 | $\Sigma_s = 3.005$ |
| Ce3-O11 | 2.492 | 0.397 |                    |
| Ce3-O20 | 2.502 | 0.386 |                    |
| Ce3-O2w | 2.513 | 0.373 |                    |
| Ce3-O8  | 2.505 | 0.382 |                    |
| Ce3-O29 | 2.506 | 0.381 |                    |
| Ce3-O10 | 2.513 | 0.373 |                    |
| Ce3-O9w | 2.62  | 0.272 |                    |
| Ce4-O6  | 2.443 | 0.459 | $\Sigma_s = 3.134$ |
| Ce4-O9  | 2.488 | 0.402 |                    |
| Ce4-O26 | 2.49  | 0.400 |                    |
| Ce4-O13 | 2.496 | 0.393 |                    |
| Ce4-O28 | 2.502 | 0.386 |                    |
| Ce4-O19 | 2.508 | 0.379 |                    |
| Ce4-O5w | 2.519 | 0.367 |                    |
| Ce4-O21 | 2.536 | 0.349 |                    |

| <b>2-Tb</b> |                  |              |                     |
|-------------|------------------|--------------|---------------------|
| Bond        | Bond lengths (Å) | Bond valence | Sum of Bond valence |
| Cr1-O14     | 1.954            | 0.496        | $\Sigma_s = 2.783$  |
| Cr1-O12     | 1.963            | 0.482        |                     |
| Cr1-O18     | 1.97             | 0.471        |                     |
| Cr1-O20     | 1.975            | 0.464        |                     |
| Cr1-O33     | 1.988            | 0.445        |                     |
| Cr1-O17     | 2.002            | 0.426        |                     |
| Cr2-O3      | 1.958            | 0.490        | $\Sigma_s = 2.723$  |
| Cr2-O8      | 1.97             | 0.471        |                     |
| Cr2-O18     | 1.983            | 0.452        |                     |
| Cr2-O20     | 1.984            | 0.451        |                     |
| Cr2-O19     | 1.985            | 0.449        |                     |
| Cr2-O34     | 1.989            | 0.444        |                     |
| Cr3-O10     | 1.978            | 0.460        | $\Sigma_s = 2.684$  |
| Cr3-O19     | 1.979            | 0.458        |                     |
| Cr3-O20     | 1.979            | 0.457        |                     |
| Cr3-O2      | 1.986            | 0.448        |                     |
| Cr3-O17     | 1.99             | 0.442        |                     |
| Cr3-O36     | 2.005            | 0.420        |                     |
| Cr4-O17     | 1.964            | 0.480        |                     |

|             |                         |                     |                            |
|-------------|-------------------------|---------------------|----------------------------|
| Cr4-O19     | 1.974                   | 0.467               | $\Sigma_s = 2.730$         |
| Cr4-O6      | 1.98                    | 0.457               |                            |
| Cr4-O18     | 1.983                   | 0.452               |                            |
| Cr4-O15     | 1.989                   | 0.444               |                            |
| Cr4-O35     | 1.996                   | 0.434               |                            |
| <b>Bond</b> | <b>Bond lengths (Å)</b> | <b>Bond valence</b> | <b>Sum of Bond valence</b> |
| Tb1-O18     | 2.351                   | 0.426               | $\Sigma_s = 2.990$         |
| Tb1-O13     | 2.368                   | 0.405               |                            |
| Tb1-O34     | 2.394                   | 0.375               |                            |
| Tb1-O9w     | 2.398                   | 0.370               |                            |
| Tb1-O31     | 2.405                   | 0.362               |                            |
| Tb1-O5      | 2.413                   | 0.356               |                            |
| Tb1-O10w    | 2.412                   | 0.355               |                            |
| Tb1-O33     | 2.425                   | 0.341               |                            |
| Tb2-O20     | 2.334                   | 0.448               | $\Sigma_s = 3.086$         |
| Tb2-O4      | 2.355                   | 0.421               |                            |
| Tb2-O11     | 2.398                   | 0.370               |                            |
| Tb2-O7w     | 2.399                   | 0.369               |                            |
| Tb2-O8w     | 2.420                   | 0.347               |                            |
| Tb2-O6w     | 2.425                   | 0.341               |                            |
| Tb2-O33     | 2.422                   | 0.344               |                            |
| Tb2-O34     | 2.336                   | 0.445               |                            |
| Tb3-O17     | 2.323                   | 0.463               | $\Sigma_s = 2.957$         |
| Tb3-O16     | 2.382                   | 0.388               |                            |
| Tb3-O9      | 2.384                   | 0.386               |                            |
| Tb3-O5w     | 2.397                   | 0.371               |                            |
| Tb3-O4w     | 2.412                   | 0.356               |                            |
| Tb3-O36     | 2.429                   | 0.337               |                            |
| Tb3-O35     | 2.436                   | 0.330               |                            |
| Tb3-O32     | 2.441                   | 0.326               |                            |
| Tb4-O19     | 2.332                   | 0.451               | $\Sigma_s = 3.061$         |
| Tb4-O7      | 2.363                   | 0.411               |                            |
| Tb4-O1      | 2.366                   | 0.408               |                            |
| Tb4-O1w     | 2.392                   | 0.378               |                            |
| Tb4-O3w     | 2.392                   | 0.377               |                            |
| Tb4-O36     | 2.413                   | 0.354               |                            |
| Tb4-O35     | 2.424                   | 0.342               |                            |
| Tb4-O2w     | 2.427                   | 0.340               |                            |
